# Supplementary material
Source: PubMed Central journal article supplement (PMC4327772)
Supplement: NIHMS569069-supplement-Supplemental_tables_1_2.pdf [file NIHMS569069-supplement-Supplemental_tables_1_2.pdf]

**Table S1. Antibodies Used for Immunblot Analysis**

| <b>Antibody</b>          | <b>Source</b>             |
|--------------------------|---------------------------|
| A $\beta$ (4G8)          | Covance                   |
| $\alpha$ -tubulin        | Sigma-Aldrich             |
| BACE1                    | Millipore                 |
| $\beta$ -actin           | Sigma-Aldrich             |
| Calcineurin              | Cell Signaling Technology |
| Calpain-1                | Cell Signaling Technology |
| CaMKII $\alpha$          | Chemicon                  |
| Cleaved caspase-3        | Cell Signaling Technology |
| Cdk5                     | Santa Cruz Biotechnology  |
| Cdk5                     | Dr. Li-Huei Tsai's lab    |
| Phospho-DARPP-32 (Thr34) | Cell Signaling Technology |
| Phospho-DARPP-32 (Thr75) | Cell Signaling Technology |
| Total-DARPP-32           | Cell Signaling Technology |
| GAPDH                    | Santa Cruz Biotechnology  |
| GFAP                     | Sigma-Aldrich             |
| GFP                      | Invitrogen                |
| Phospho-GluA1 (Ser831)   | Millipore                 |
| Phospho-GluA1 (Ser845)   | Millipore                 |
| Total-GluA1              | Abcam                     |
| GluN2A                   | Covance                   |
| GluN2B                   | NeuroMab                  |
| HA-probe                 | Santa Cruz Biotechnology  |
| HDAC2                    | Santa Cruz Biotechnology  |
| Ach3 (H3K9/14)           | Millipore                 |
| Iba-1                    | Synaptic Systems          |
| NeuN                     | Millipore                 |
| p35                      | Dr. Li-Huei Tsai's lab    |
| p39                      | Dr. Li-Huei Tsai's lab    |
| PP1                      | Santa Cruz Biotechnology  |
| PSD-95                   | Upstate                   |
| Synaptophysin            | Sigma-Aldrich             |

**Table S2. Primers Used in This Study and the Corresponding Sequences**

| <b>Primer name</b>       | <b>Primer sequence (5' - 3')</b>                                    |
|--------------------------|---------------------------------------------------------------------|
| MmutP35-NheI             | GGATGCTAGCGTCGACATGGGCACGGTGCTGTCCCTATC                             |
| MmutP35-4xh              | GAGAATTCTCACTCGAGCCGATCCAGCCCCAGGAGGAGT                             |
| SallHA-F                 | GATTCCATGCGTCTGACTACCCATACGATGTTCCCTGACT                            |
| SalHA-R                  | GGCCTTAAGTGTCTGACAGCGTAATCTGGAACGTCATA                              |
| MmutP35-2                | CGAACGTTATGCCGGCGGGGGCTGGAGACAGGACAGCGACTT<br>CTTCAGGTTT            |
| MmutP35-3                | CAGCCCCCGCCGGCTCAGCCGC                                              |
| M-p35-200bp-F            | TTATACGAATGCGGCCGCGCCCCTGTAGCCGGTATCCTGGCT<br>CAAGGAT               |
| M-p35-200bp-R            | ATTACTTACCGCGGCAGTCCCTTGAGTCCCGGAAAGTGA                             |
| P35L_out                 | AAGGAATCAAGCGGCCGCGATATCCAGGACAGGACCCTAGTC<br>AGGAGCTGGTTTGAATTCTTG |
| P35L_in                  | TCAGGAGCTGGTTTGAATTCTTGCCCTTCTCAATTACGACTCGA<br>GATCTGAGTCCGGAAGTGT |
| P35S_out                 | GGGGTACCGCTCCGTGTCAGACCATCTGAGGGCCCAGGATCG<br>GCTCTTAGGAACCCGGAT    |
| P35S_in                  | GATCGGCTCTCTAGGAACCCGGATGACTCGAGATGGTGAGCA<br>AGGGCGAGGAGC          |
| Neo_F                    | TTGTCTGAGTAGGTGTCATTCTA                                             |
| Neo_R                    | CCGGACGTGAGTCGTTTCGGAACGT                                           |
| 3UTR-SeqF                | GCCCTTCCTGGTAGAGAGAGCTGT                                            |
| 3UTR-SeqR                | GTTGGAGGACCTGGACTCAG                                                |
| P35_P1-F                 | GGTAAGAAACAGGCTGTAGTTCT                                             |
| P35_P1-R                 | AGAGGCCATGACAACCAAGTCAC                                             |
| P35_P2-F                 | TCACATCCTGCTGCCACGGTGA                                              |
| P35_P2-R                 | TGTAAAAGCAACAAGAATAAAG                                              |
| p35KI-F                  | GTCAGGAGGACAAGAAGCGACTCCT                                           |
| p35KI-R                  | CCGGACGTGAGTCGTTTCGGAACGT                                           |
| Mm-p35 ForMID            | GCGCTCCAGGCGTCCACTAGTGAGCTGCT                                       |
| Mm-p35 RevMID            | GCGCCGGCAGAGAACTCACCCAGGCAG                                         |
| p35-1131-F               | AGGCTGTCCTGCTGACCTG                                                 |
| p35-1495-R               | GCCCTTGGTGGCTCTGCTA                                                 |
| TNF- $\alpha$ -F (qPCR)  | AGCACAGAAAGCATGATCCG                                                |
| TNF- $\alpha$ -R (qPCR)  | GGAGTAGACAAGGTACAACC                                                |
| Il-1 $\beta$ -F (qPCR)   | ACCTGCTGGTGTGTGACGTTT                                               |
| Il-1 $\beta$ -R (qPCR)   | CAGCACGAGGCTTTTTTGTGTTGT                                            |
| MIP-1 $\alpha$ -F (qPCR) | TTGAGCCCCGGAACATTC                                                  |
| MIP-1 $\alpha$ -R (qPCR) | GCAGCAAACAGCTTATAGGAGATG                                            |
